# Supplementary material for: Prevalence of drug interactions in hospitalised elderly patients: a systematic review
Source: HighWire-hosted journal article supplement (doi:10.1136/ejhpharm-2019-002111), 2020-02-10
Supplement: ejhpharm-2019-002111supp003_data_supplement.pdf [file ejhpharm-2019-002111supp003_data_supplement.pdf]

## Prevalence of drug interactions in hospitalized elderly patients: a systematic review

Luciana Mello de Oliveira 1,2; Juliana do Amaral Carneiro Diel1; Alessandra Nunes3; Tatiane da Silva Dal Pizzol 1,2,3

1Programa de Pós-Graduação em Epidemiologia, Faculdade de Medicina, Universidade Federal do Rio Grande do Sul.

2Programa de Pós-Graduação em Assistência Farmacêutica, Faculdade de Farmácia, Universidade Federal do Rio Grande do Sul.

3Faculdade de Farmácia, Universidade Federal do Rio Grande do Sul.

Corresponding author: Luciana Mello de Oliveira – [oliveirm@gmail.com](mailto:oliveirm@gmail.com) and Tatiane da Silva Dal Pizzol - [tatiane.silva@ufrgs.br](mailto:tatiane.silva@ufrgs.br)

**Supplementary Table 3:** Number of patients with interaction, number of DDI per patient with at least one DDI, drugs or drug classes mostly involved with DDI and drug combinations mostly involved with DDI. In cases which prevalence were described, we reported the three drugs mostly involved with drug interactions or the three drug combinations (or drug classes) mostly involved with DDI. ACE: angiotensin-converting enzyme. NA: not available. NSAID: non-steroidal anti-inflammatory drugs. PPI: proton-pump inhibitors.

| First autor                 | # of patients with interactions                    | # of DDI per patient with interaction | Drugs or drug classes mostly involved with DDI                                                                                               | Drug combinations mostly involved with DDI                                                                                                                                                                                                                                                                                                                                                                                                                                 |
|-----------------------------|----------------------------------------------------|---------------------------------------|----------------------------------------------------------------------------------------------------------------------------------------------|----------------------------------------------------------------------------------------------------------------------------------------------------------------------------------------------------------------------------------------------------------------------------------------------------------------------------------------------------------------------------------------------------------------------------------------------------------------------------|
| Barak-Tsarfir O, et al (61) | Unclear: around 56 patients                        | NA                                    | NA                                                                                                                                           | NA                                                                                                                                                                                                                                                                                                                                                                                                                                                                         |
| Blix HS, et al (29)         | 70 (evaluated only serious or contraindicated DDI) | NA                                    | Warfarin; digitoxin; prednisolone<br>antithrombotic agents; non-steroidal anti-inflammatory agents; angiotensin converting enzyme inhibitors | N/A                                                                                                                                                                                                                                                                                                                                                                                                                                                                        |
| Castilho ECD (30)           | NA                                                 | NA                                    | NA                                                                                                                                           | Serious: chlorpromazine + promethazine; chlorpromazine + haloperidol; haloperidol + promethazine; diazepam + phenobarbital; risperidone + haloperidol; carbamazepine + ketoconazole; carbamazepine + chlorpromazine; haloperidol + ketoconazole; chlorpromazine + ketoconazole; chlorpromazine + sodium phosphate.<br>Contraindicated: ketoconazole + simvastatin; ketoconazole + amiodarone; chlorpromazine + metoclopramide; promethazine + metoclopramide; ketoconazole |

|                                  |                                                                                            |                                                                                                |                                                                                                                                                          |                                                                                                                                                                                                                                                                                                                                                                                                                        |
|----------------------------------|--------------------------------------------------------------------------------------------|------------------------------------------------------------------------------------------------|----------------------------------------------------------------------------------------------------------------------------------------------------------|------------------------------------------------------------------------------------------------------------------------------------------------------------------------------------------------------------------------------------------------------------------------------------------------------------------------------------------------------------------------------------------------------------------------|
|                                  |                                                                                            |                                                                                                |                                                                                                                                                          | + fluconazole; ziprasidone + chlorpromazine; ziprasidone + haloperidol; biperiden + potassium chloride; + risperidone metoclopramide; citalopram + ketoconazole; citalopram + selegiline; carbamazepine + selegiline; amitriptyline + ziprasidone; fluconazole + haloperidol; fluconazole + ziprasidone                                                                                                                |
| Chahin RC (31)                   | 83                                                                                         | NA                                                                                             | NA                                                                                                                                                       | NA                                                                                                                                                                                                                                                                                                                                                                                                                     |
| Correia LM, et al (32)           | NA                                                                                         | NA                                                                                             | NA                                                                                                                                                       | Aspirin + dipyridamol; clopidogrel + fluoxetine; diazepam + morphine; clopidogrel + omeprazole; diazepam + fluoxetine; diltiazem + phenytoin.                                                                                                                                                                                                                                                                          |
| Costa, SC (33)                   | 144                                                                                        | 4.5                                                                                            | Dipyrrone; captopril; furosemide; metoclopramide; propranolol.                                                                                           | Dipyrrone + captopril; dipyrrone+furosemide; digoxin+metoclopramide.                                                                                                                                                                                                                                                                                                                                                   |
| Cuentro VS (34)                  | NA                                                                                         | 8.6                                                                                            | Aspirin; captopril; enoxaparin; furosemide; insulin; spironolactone.                                                                                     | Captopril + insulin; captopril + enoxaparin; captopril + spironolactone.                                                                                                                                                                                                                                                                                                                                               |
| de Oliveira, LR (42)             | NA                                                                                         | NA                                                                                             | NA                                                                                                                                                       | Allopurinol + hydrochlorothiazide; potassium chloride + enalapril; potassium chloride + spironolactone; digoxin + aluminum dioxide; digoxine + amiodarone; digoxin + enalapril / digoxin + furosemide; digoxin + metoclopramide; enalapril + spironolactone; furosemide + amikacyn + furosemide + gentamicin; haloperidol + promethazine; metoclopramide + venlafaxine; omeprazole + phenytoin; omeprazole + diazepam. |
| Danisha P, et al (36)            | 200                                                                                        | 2.95                                                                                           | NA                                                                                                                                                       | NA                                                                                                                                                                                                                                                                                                                                                                                                                     |
| Devarapalli P et al (37)         | 58                                                                                         | 1.35                                                                                           | NA                                                                                                                                                       | Albuterol + doxofylline; albuterol + digoxin; amikacin + furosemide; aspirin + diclofenac.                                                                                                                                                                                                                                                                                                                             |
| Doan J, et al (15)               | 221                                                                                        | NA                                                                                             | NA                                                                                                                                                       | NA                                                                                                                                                                                                                                                                                                                                                                                                                     |
| dos Santos RM, et al (35)        | NA                                                                                         | NA                                                                                             | NA                                                                                                                                                       | Captopril + dipyrrone; dipyrrone + insulin; digoxin + furosemide; captopril + digoxin; captopril + spironolactone; dipyrrone + glyburide ; dipyrrone + metoclopramide                                                                                                                                                                                                                                                  |
| Egger T, et al (38)              | NA                                                                                         | NA                                                                                             | NA                                                                                                                                                       | NA                                                                                                                                                                                                                                                                                                                                                                                                                     |
| George AS, et al (39)            | 659                                                                                        | 3.022                                                                                          | NA                                                                                                                                                       | NA                                                                                                                                                                                                                                                                                                                                                                                                                     |
| Ghibelli S, et al (40)           | 67 at admission; 65 at discharge                                                           | 4.49 at admission; 5.08 at discharge                                                           | NA                                                                                                                                                       | Warfarin + canrenone; ramipril + canrenone; digoxin + furosemide; aspirin + clopidogrel; amlodipine + simvastatin; amiodarone + simvastatin; simvastatin + diltiazem                                                                                                                                                                                                                                                   |
| Gutierrez-Valencia M, et al (41) | 165                                                                                        | NA                                                                                             | Antidepressants; antiparkinsonians; benzodiazepines; diuretics; proton-pump inhibitors; vitamin K antagonists; drugs for cardiac therapy; buprenorphine. | NA                                                                                                                                                                                                                                                                                                                                                                                                                     |
| Jankovic SM, et al (60)          | Using Medscape® Drug Interaction Checker: 145;<br>Using Epocrates® Interaction Check: 140; | Using Medscape® Drug Interaction Checker: 30.56;<br>Using Epocrates® Interaction Check: 17.47; | NA                                                                                                                                                       | Midazolam + tramadol                                                                                                                                                                                                                                                                                                                                                                                                   |

|                              | Using Drug-Reax System®:<br>137 | Using Drug-Reax System®:<br>11.03 |                                                                                                                                                                                                     |                                                                                                                                                                                                                                                                                                                                                                                                                                                                                                        |
|------------------------------|---------------------------------|-----------------------------------|-----------------------------------------------------------------------------------------------------------------------------------------------------------------------------------------------------|--------------------------------------------------------------------------------------------------------------------------------------------------------------------------------------------------------------------------------------------------------------------------------------------------------------------------------------------------------------------------------------------------------------------------------------------------------------------------------------------------------|
| Juárez-Cedillo T, et al (56) | 69                              | 3.1                               | Dipyron, furosemide, enoxaparin, enalapril, lysine clonixinate, losartan.                                                                                                                           | Heparin + NSAID; digoxin + calcium gluconate; clopidogrel + ciprofloxacin; phenytoin + nimodipine                                                                                                                                                                                                                                                                                                                                                                                                      |
| Kashyap M, et al (58)        | 126                             | 1.198                             | NA                                                                                                                                                                                                  | Anticoagulant drugs + clopidogrel + aspirin; clopidogrel + PPI; ramipril + spironolactone.                                                                                                                                                                                                                                                                                                                                                                                                             |
| Locatelli, J (43)            | NA                              | NA                                | Warfarin                                                                                                                                                                                            | Warfarin + omeprazole; warfarin + levothyroxine; warfarin + enoxaparin                                                                                                                                                                                                                                                                                                                                                                                                                                 |
| Matanovic SM, et al (44)     | 149                             | NA                                | ace inhibitors; anticoagulants; antiplatelet agents; ATII blockers; benzodiazepins; potassium spare diuretics; potassium supplements; opiates; Atorvastatin; methyl digoxin; simvastatin; warfarin. | NA                                                                                                                                                                                                                                                                                                                                                                                                                                                                                                     |
| Melo DO, et al (45)          | 247                             | NA                                | NA                                                                                                                                                                                                  | Anticoagulants + antiplatelet drugs; aspirin + heparin; clopidogrel + omeprazole                                                                                                                                                                                                                                                                                                                                                                                                                       |
| Mohammed S, et al (46)       | NA                              | NA                                | NA                                                                                                                                                                                                  | NA                                                                                                                                                                                                                                                                                                                                                                                                                                                                                                     |
| Narvekar RS, et al (59)      | NA                              | NA                                | Clobazam; diazepam; lorazepam; nitrofurantoin                                                                                                                                                       | NA                                                                                                                                                                                                                                                                                                                                                                                                                                                                                                     |
| Parreira RBC (57)            | 8                               |                                   | NA                                                                                                                                                                                                  | Losartan + valsartan; metoprolol + ranitidine; omeprazole + metoprolol; enoxaparin + aspirin.                                                                                                                                                                                                                                                                                                                                                                                                          |
| Pedroso, FM (47)             | NA                              | 23.59                             | NA                                                                                                                                                                                                  | NA                                                                                                                                                                                                                                                                                                                                                                                                                                                                                                     |
| Radosevic N, et al (49)      | 36                              | NA                                | NA                                                                                                                                                                                                  | ACE inhibitors + potassium supplement; heparin + aspirin; heparin + coumarin anticoagulant; amiodarone + coumarin anticoagulant + coumarin anticoagulant + aspirin; methyl digoxin + hydrochlorothiazide; ACE inhibitor + potassium-sparing diuretic; coumarin anticoagulant + quinolone; Potassium-sparing diuretic + potassium supplement; benzodiazepine-tranquilizer + benzodiazepine-hypnotic; amiodarone + methyl digoxin; NSAID + diuretic; amiodarone + phenytoin; ACE inhibitor + allopurinol |
| Rafiei H, et al (50)         | NA                              | NA                                | Dexamethasone; heparin; phenytoin, ranitidine.                                                                                                                                                      | NA                                                                                                                                                                                                                                                                                                                                                                                                                                                                                                     |
| Sapkota S, et al (48)        | NA                              | NA                                | NA                                                                                                                                                                                                  | Meperidine + promethazine; ketorolac + diclofenac; gentamicin + cefotaxime; isoniazid + rifampin                                                                                                                                                                                                                                                                                                                                                                                                       |
| Senín, LD (52)               | 13                              | 1.69                              | Acenocoumarol; omeprazole.                                                                                                                                                                          | Omeprazole + acenocoumarol; acenocoumarol + levothyroxine                                                                                                                                                                                                                                                                                                                                                                                                                                              |
| Rosas-Carrasco O, et al (51) | 317                             | 11.15                             | NA                                                                                                                                                                                                  | Fluoroquinolone + antidiabetic drugs; low molecular weight heparin + anticoagulants; low molecular weight heparin + NSAID.                                                                                                                                                                                                                                                                                                                                                                             |
| Schuler J, et al (53)        | 356                             | NA                                | NA                                                                                                                                                                                                  | Benzodiazepine + opioid; amiodarone + betablocker; tramadol and selective reuptake inhibitors.                                                                                                                                                                                                                                                                                                                                                                                                         |
| Teka F, et al (54)           | 87                              | NA                                | NA                                                                                                                                                                                                  | Heparin + aspirin; spironolactone + enalapril; aspirin + clopidogrel                                                                                                                                                                                                                                                                                                                                                                                                                                   |
| Yong TY, et al (55)          | NA                              | NA                                | NA                                                                                                                                                                                                  | NA                                                                                                                                                                                                                                                                                                                                                                                                                                                                                                     |
